# Supplementary material
Source: Royal Society of Chemistry journal article supplement (doi:10.1039/d6qi00298f)
Supplement: d6qi00298f1.pdf [file d6qi00298f1.pdf]

## Supporting Information

### Multiferroicity Engineered by Co<sup>2+</sup> Substitution in Hybrid Ferroelectrics

Ya-Ru Kong,<sup>a</sup> Xiao-Lin Zhao,<sup>a</sup> Dong-Sheng Shao,<sup>\*a</sup> Wei Ye,<sup>a</sup> Weihua Ning,<sup>\*b</sup> Zheng-Fang Tian,<sup>c</sup> Hong-Bin Luo,<sup>a</sup> Xiao-Ming Ren<sup>\*a</sup>

<sup>a</sup> State Key Laboratory of Materials-Oriented Chemical Engineering and College of Chemistry and Molecular Engineering, Nanjing Tech University, Nanjing 211816, P. R. China. E-mail: [shaods@njtech.edu.cn](mailto:shaods@njtech.edu.cn), [xmren@njtech.edu.cn](mailto:xmren@njtech.edu.cn)

<sup>b</sup> State Key Laboratory of Bioinspired Interfacial Materials Science, Institute of Functional Nano & Soft Materials (FUNSOM), Soochow University, Suzhou, 215123 P. R. China. E-mail: [whning@suda.edu.cn](mailto:whning@suda.edu.cn)

<sup>c</sup> Hubei Key Laboratory for Processing and Application of Catalytic Materials, Huanggang Normal University, Huanggang 438000, P. R. China

## Contents

### Figures

**Figure S1.** The crystal structure of TMAPbI<sub>3</sub>.

**Figure S2.** The FESEM, EDS mapping and EDS spectra of TMAPbI<sub>3</sub>.

**Figure S3.** FESEM images, EDS mapping and EDS spectra of TMA<sub>1-x</sub>Pb<sub>1-x</sub>Co<sub>x</sub>I<sub>3-x</sub> (x = 0.03).

**Figure S4.** FESEM images, EDS mapping and EDS spectra of TMA<sub>1-x</sub>Pb<sub>1-x</sub>Co<sub>x</sub>I<sub>3-x</sub> (x = 0.07).

**Figure S5.** FESEM images, EDS mapping and EDS spectra of TMA<sub>1-x</sub>Pb<sub>1-x</sub>Co<sub>x</sub>I<sub>3-x</sub> (x = 0.10).

**Figure S6.** Pawley refinement of TMA<sub>1-x</sub>Pb<sub>1-x</sub>Co<sub>x</sub>I<sub>3-x</sub> (a) x = 0.03 and (b) x = 0.07.

**Figure S7.** TG and error bar of decomposition temperature for all samples from three repeated measurements.

**Figure S8.** FT-IR spectra of TMA<sub>1-x</sub>Pb<sub>1-x</sub>Co<sub>x</sub>I<sub>3-x</sub> (x = 0–0.10).

**Figure S9.** Raman spectra of TMA<sub>1-x</sub>Pb<sub>1-x</sub>Co<sub>x</sub>I<sub>3-x</sub> (x = 0–0.10).

**Figure S10.** XPS spectra of TMA<sub>1-x</sub>Pb<sub>1-x</sub>Co<sub>x</sub>I<sub>3-x</sub> (x = 0–0.10), (a) C 1s, (b) N1s and (c) Co 2p.

**Figure S11.** Simulated XPS spectrum of Co 2p<sub>1/2</sub> and Co 2p<sub>3/2</sub> from TMA<sub>1-x</sub>Pb<sub>1-x</sub>Co<sub>x</sub>I<sub>3-x</sub>, (a) x = 0.03, (b) x = 0.07, (c) x = 0.10.

**Figure S12.** P–E loops for TMA<sub>1-x</sub>Pb<sub>1-x</sub>Co<sub>x</sub>I<sub>3-x</sub> (x = 0 and 0.10) hybrids at 160 K and at different frequencies.

**Figure S13.** Plots of molar paramagnetic susceptibility  $\chi_p$  versus temperature for TMA<sub>1-x</sub>Pb<sub>1-x</sub>Co<sub>x</sub>I<sub>3-x</sub> with x = 0.03–0.10 range in 2–400 K.

**Figure S14.** The molar magnetic susceptibility of TMAPbI<sub>3</sub>.

**Figure S15.** Plots of molar paramagnetic susceptibility  $\mu_{\text{eff}}$  versus temperature for TMA<sub>1-x</sub>Pb<sub>1-x</sub>Co<sub>x</sub>I<sub>3-x</sub> with x = 0.03–0.10 range in 2–400 K.

**Figure S16.** Temperature dependences of AC magnetic susceptibility  $\chi_m'$  and  $\chi_m''$  in the frequency of 1 Hz for TMA<sub>1-x</sub>Pb<sub>1-x</sub>Co<sub>x</sub>I<sub>3-x</sub> with x = (a) 0.03, (b) 0.07 and (c) 0.10.

**Figure S17.** (a) Vogel–Fulcher (VF), (b) plot of  $\phi$  vs.  $\log\omega$  and (c) Plot of  $\ln(T_f)$  vs.

log $\omega$  fit for  $\text{TMA}_{1-x}\text{Pb}_{1-x}\text{Co}_x\text{I}_{3-x}$  ( $x = 0.10$ ).

**Figure S18.** Magnetization vs. applied DC field curves for  $\text{TMA}_{1-x}\text{Pb}_{1-x}\text{Co}_x\text{I}_{3-x}$  with  $x = 0.03$ – $0.10$  at 2–20 K.

**Figure S19.** Magnetization vs. applied DC field curves for  $\text{TMA}_{1-x}\text{Pb}_{1-x}\text{Co}_x\text{I}_{3-x}$  with (a)  $x = 0.07$  and (b)  $x = 0.10$  at 2–20 K.

**Figure S20.** Fits of magnetization vs. magnetic field for  $\text{TMA}_{1-x}\text{Pb}_{1-x}\text{Co}_x\text{I}_{3-x}$ , (a)  $x = 0.03$ , (b)  $x = 0.07$ , (c)  $x = 0.10$  at 2 K and 5 K.

## Tables

**Table S1.** Molar ratio of Co to Pb in  $\text{TMA}_{1-x}\text{Pb}_{1-x}\text{Co}_x\text{I}_{3-x}$  ( $x = 0$ – $0.10$ ) in form of  $x:(1-x)$

**Table S2.** Detailed vibrational assignments in FT-IR spectrum for  $\text{TMA}_{1-x}\text{Pb}_{1-x}\text{Co}_x\text{I}_{3-x}$  ( $x = 0$ – $0.10$ )

**Table S3.** Detailed vibrational assignments in Raman spectrum for  $\text{TMA}_{1-x}\text{Pb}_{1-x}\text{Co}_x\text{I}_{3-x}$  ( $x = 0$ – $0.10$ )

**Table S4.** The X-ray photoelectron binding energy values of N 1s, Pb 4f<sub>5/2</sub> and Pb 4f<sub>7/2</sub>, Co 2p<sub>1/2</sub> and Co 2p<sub>3/2</sub>, I 3d<sub>3/2</sub> and I 3d<sub>5/2</sub> from  $\text{TMA}_{1-x}\text{Pb}_{1-x}\text{Co}_x\text{I}_{3-x}$  ( $x = 0$ – $0.10$ )

**Table S5.** Parameters obtained by fit of M–H plots at different temperatures for  $\text{TMA}_{1-x}\text{Pb}_{1-x}\text{Co}_x\text{I}_{3-x}$  ( $x = 0.03$ – $0.10$ )

## References

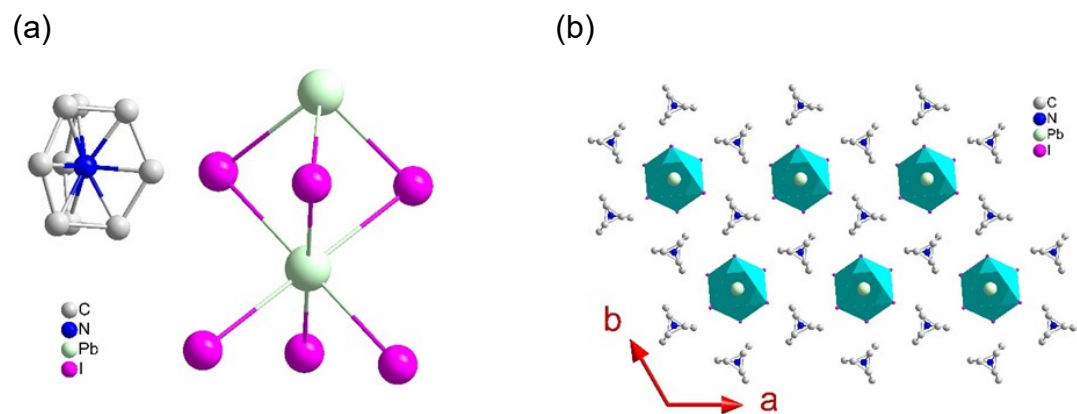

**Figure S1.** The crystal structure of TMAPbI<sub>3</sub> (a) asymmetric unit and (b) packing structure along with c-axis.

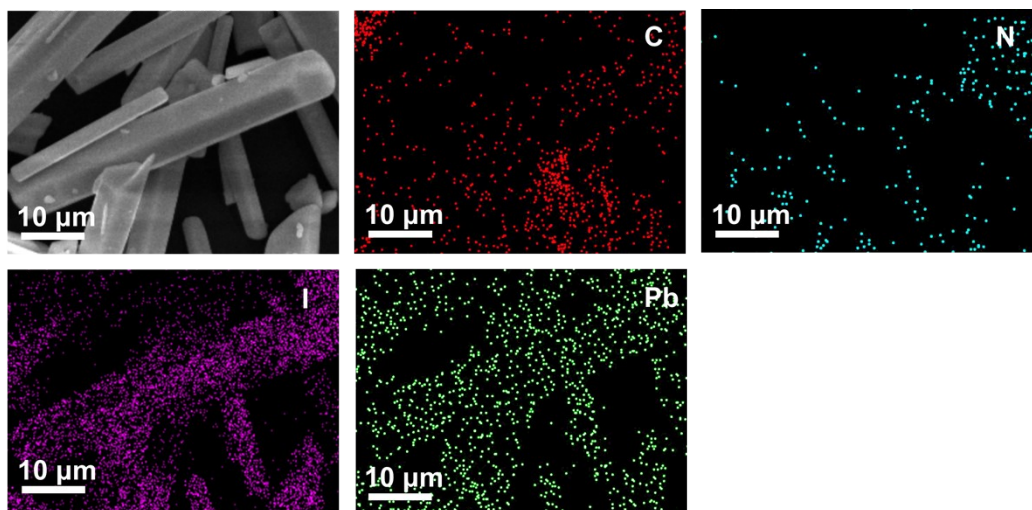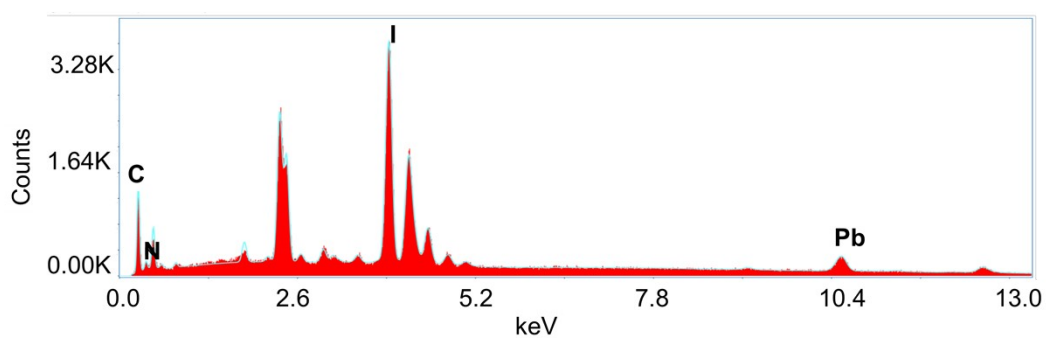

| Element | Weight percentage | MDL  | Atomic percentage | Net strength | Error % | R      | A      | F      |
|---------|-------------------|------|-------------------|--------------|---------|--------|--------|--------|
| C K     | 21.05             | 0.48 | 72.91             | 23.60        | 11.46   | 0.7183 | 0.1311 | 1.0000 |
| N K     | 2.12              | 0.45 | 6.28              | 2.95         | 19.08   | 0.7255 | 0.0677 | 1.0000 |
| I L     | 42.28             | 0.54 | 13.86             | 173.71       | 4.65    | 0.8129 | 0.7624 | 1.0080 |
| Pb L    | 34.56             | 3.25 | 6.94              | 21.25        | 14.19   | 0.9404 | 0.9723 | 1.0458 |

**Figure S2.** FESEM images, EDS mapping and EDS spectra of TMAPbI<sub>3</sub>.

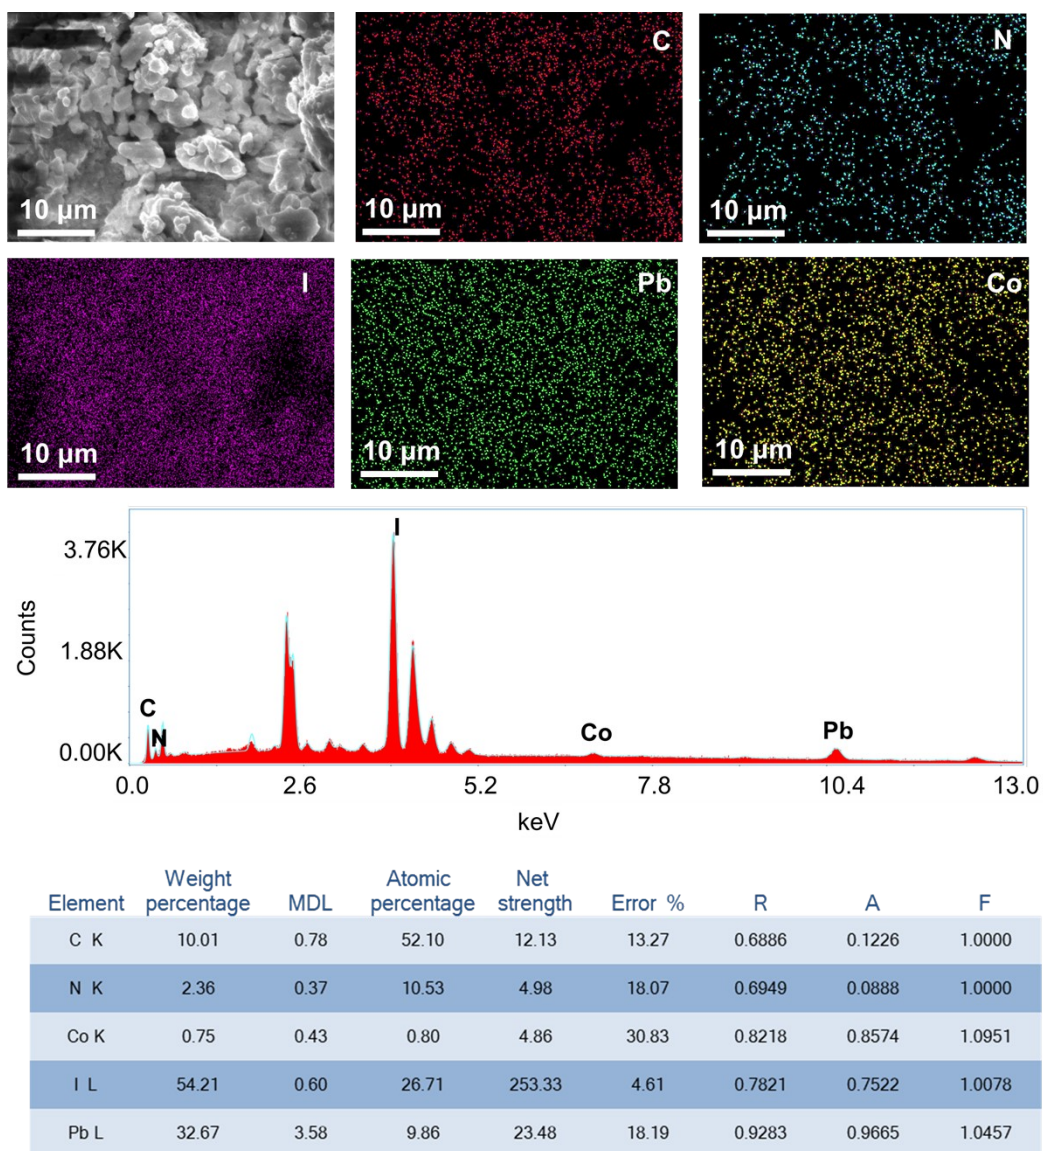

**Figure S3.** FESEM images, EDS mapping and EDS spectra of  $\text{TMA}_{1-x}\text{Pb}_{1-x}\text{Co}_x\text{I}_{3-x}$  ( $x = 0.03$ ).

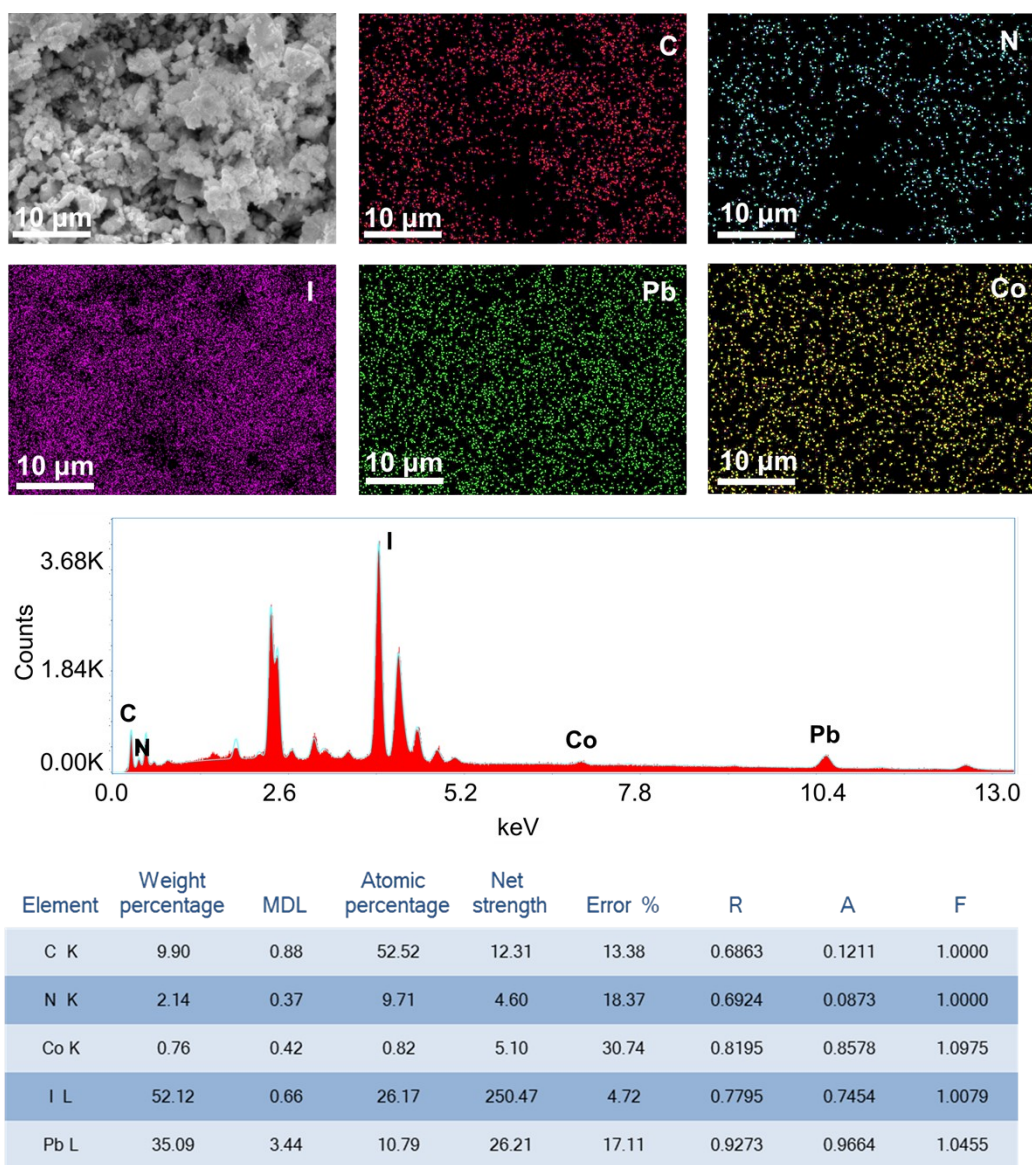

**Figure S4.** FESEM images, EDS mapping and EDS spectra of  $\text{TMA}_{1-x}\text{Pb}_{1-x}\text{Co}_x\text{I}_{3-x}$  ( $x = 0.07$ ).

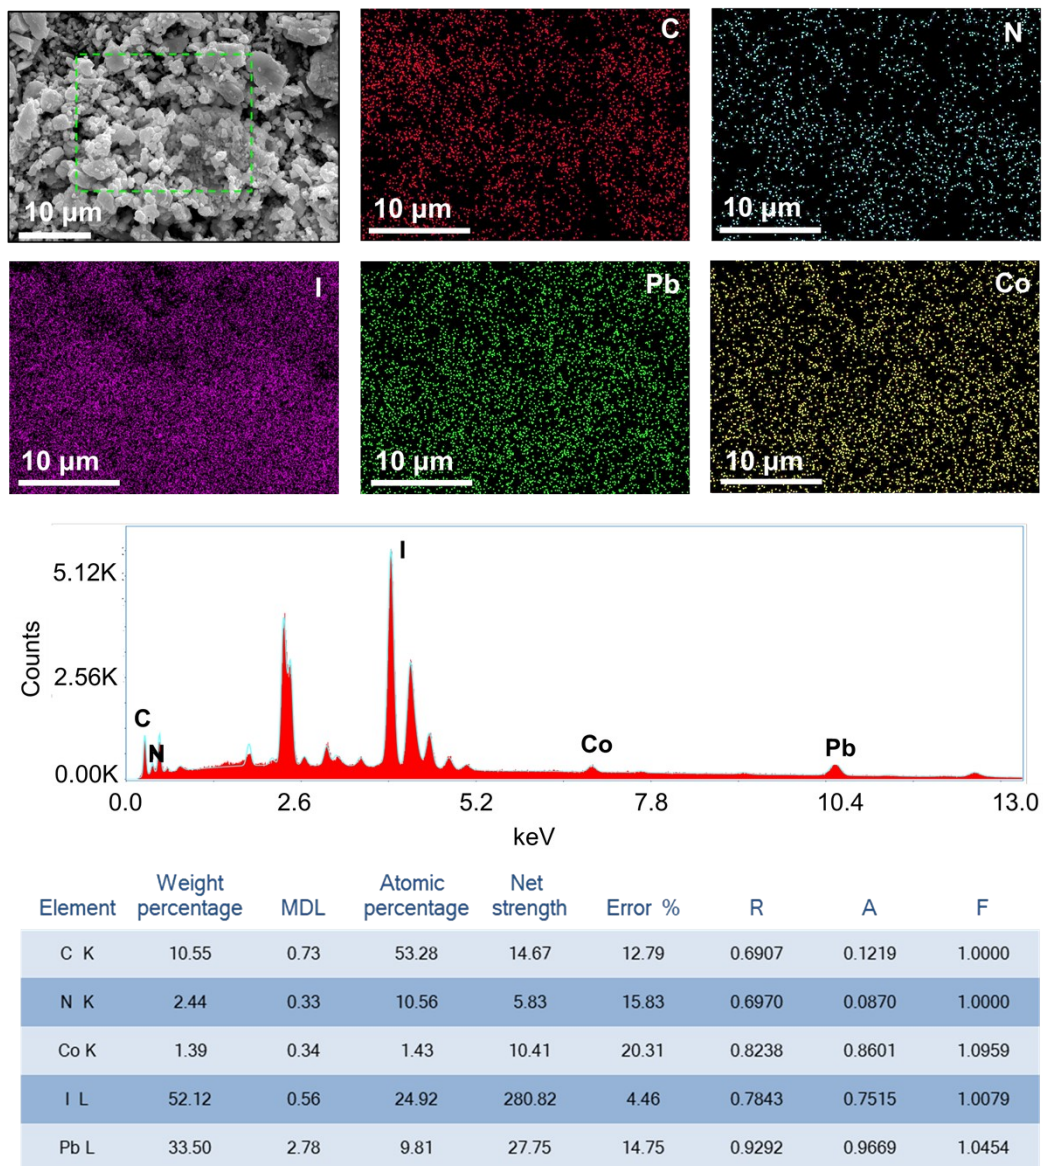

**Figure S5.** FESEM images, EDS mapping and EDS spectra of  $\text{TMA}_{1-x}\text{Pb}_{1-x}\text{Co}_x\text{I}_{3-x}$  ( $x = 0.10$ ).

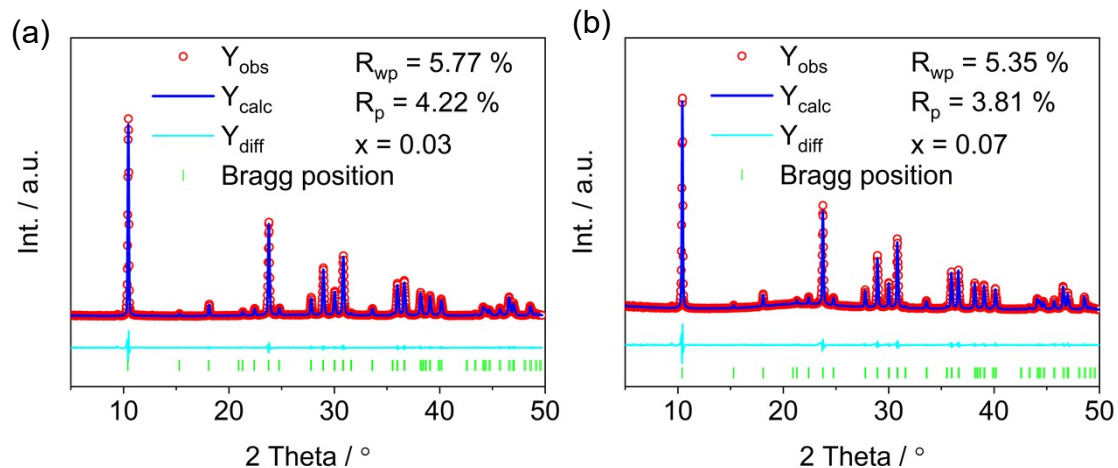

**Figure S6.** Pawley refinement of  $\text{TMA}_{1-x}\text{Pb}_{1-x}\text{Co}_x\text{I}_{3-x}$  (a)  $x = 0.03$  and (b)  $x = 0.07$ .

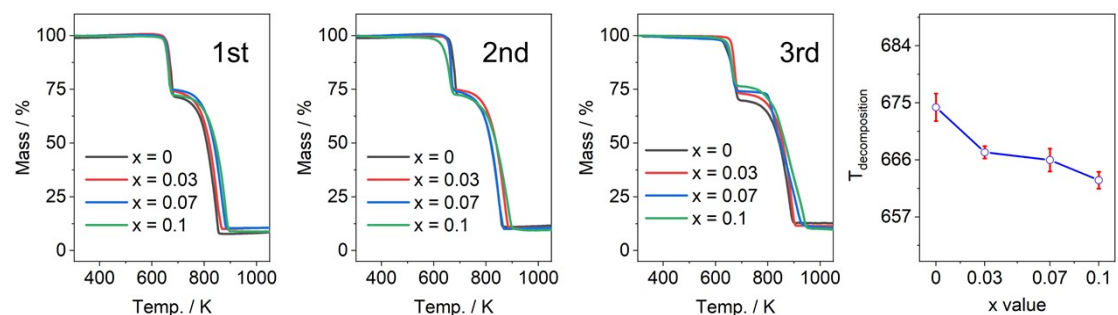

**Figure S7.** TG and error bar of decomposition temperature for all samples from three repeated measurements.

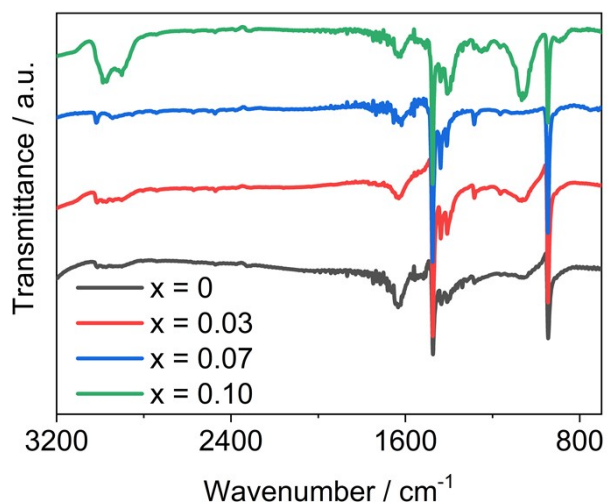

**Figure S8.** FT-IR spectra of  $\text{TMA}_{1-x}\text{Pb}_{1-x}\text{Co}_x\text{I}_{3-x}$  ( $x = 0-0.10$ ).

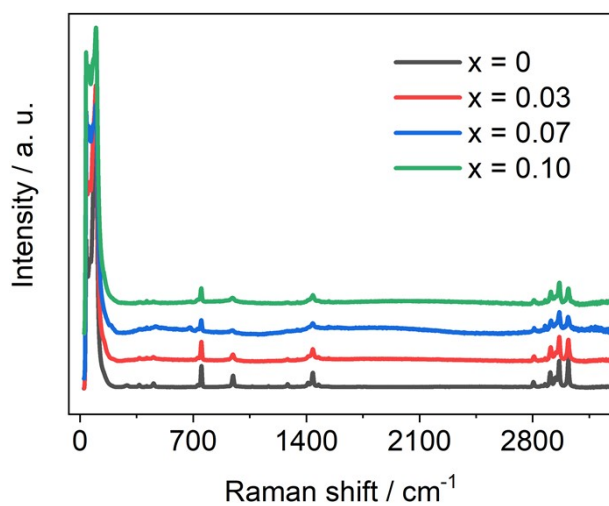

**Figure S9.** Raman spectra of  $\text{TMA}_{1-x}\text{Pb}_{1-x}\text{Co}_x\text{I}_{3-x}$  ( $x = 0-0.10$ ).

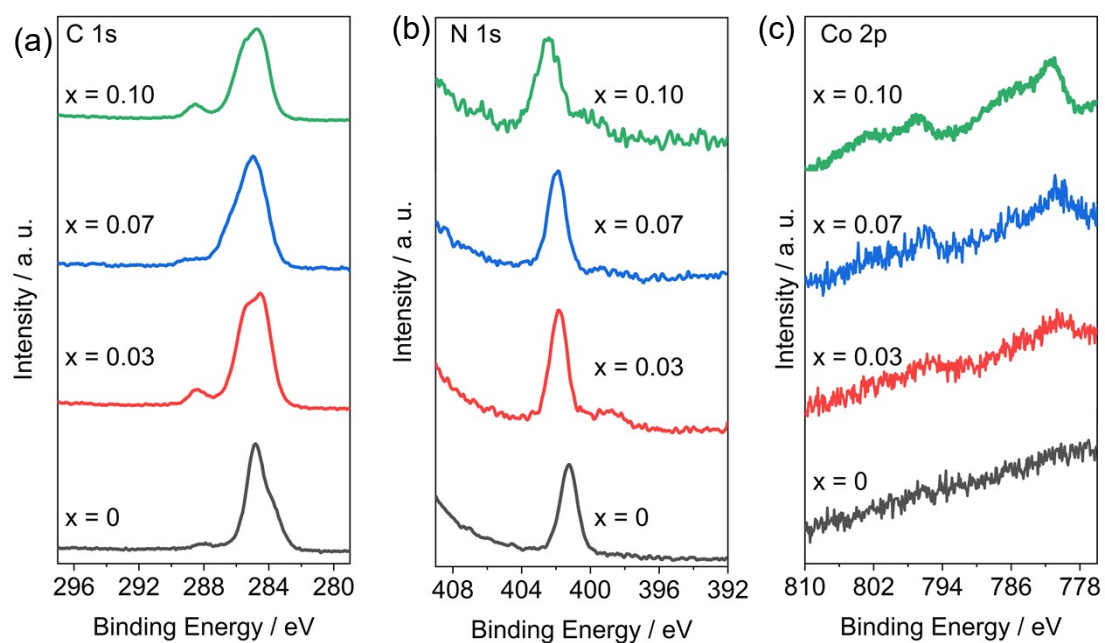

**Figure S10.** XPS spectra of  $\text{TMA}_{1-x}\text{Pb}_{1-x}\text{Co}_x\text{I}_{3-x}$  ( $x = 0 - 0.10$ ), (a) C 1s, (b) N1s and (c) Co 2p.

(c)

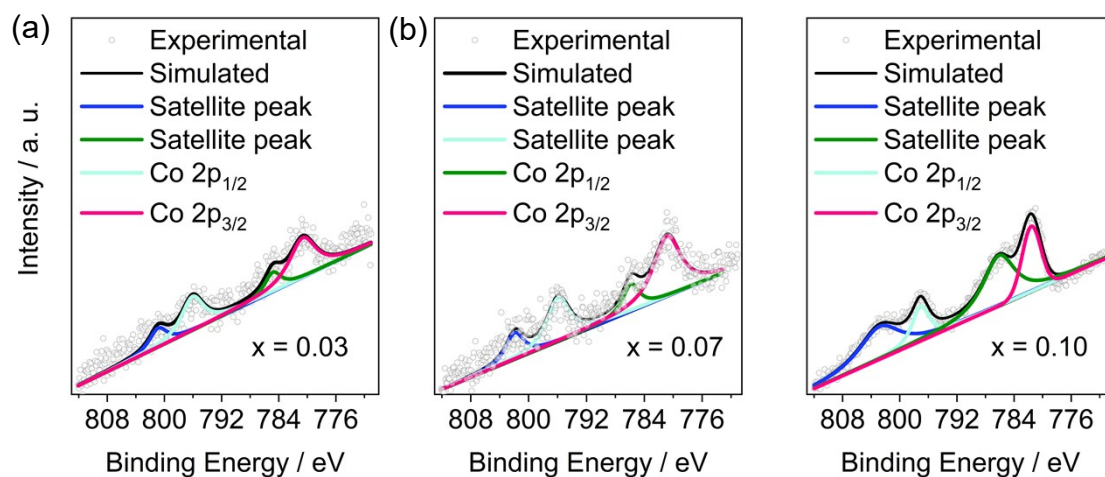

**Figure S11.** Simulated XPS spectrum of Co  $2p_{1/2}$  and Co  $2p_{3/2}$  from  $\text{TMA}_{1-x}\text{Pb}_{1-x}\text{Co}_x\text{I}_{3-x}$ , (a)  $x = 0.03$ , (b)  $x = 0.07$ , (c)  $x = 0.10$ .

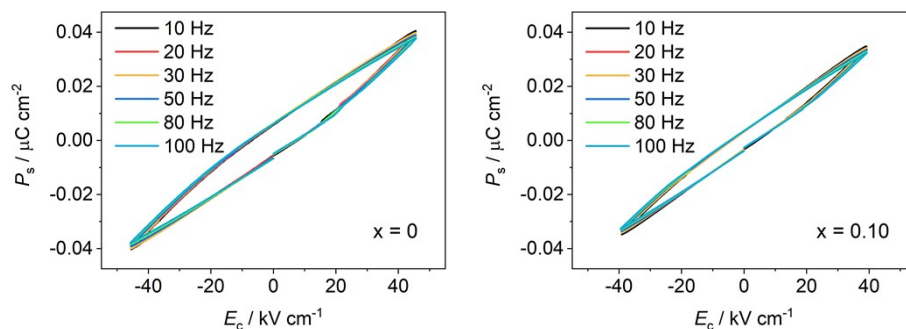

**Figure S12.** P-E loops for  $\text{TMA}_{1-x}\text{Pb}_{1-x}\text{Co}_x\text{I}_{3-x}$  ( $x = 0$  and  $0.10$ ) hybrids at 160 K and at different frequencies.

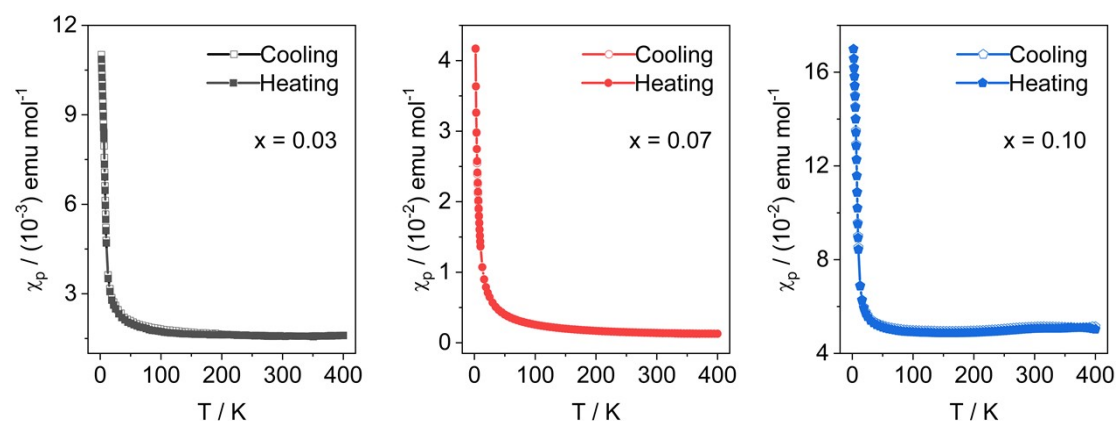

**Figure S13.** Plots of molar paramagnetic susceptibility  $\chi_p$  versus temperature for  $\text{TMA}_{1-x}\text{Pb}_{1-x}\text{Co}_x\text{I}_{3-x}$  with  $x = 0.03$ – $0.10$  range in 2–400 K.

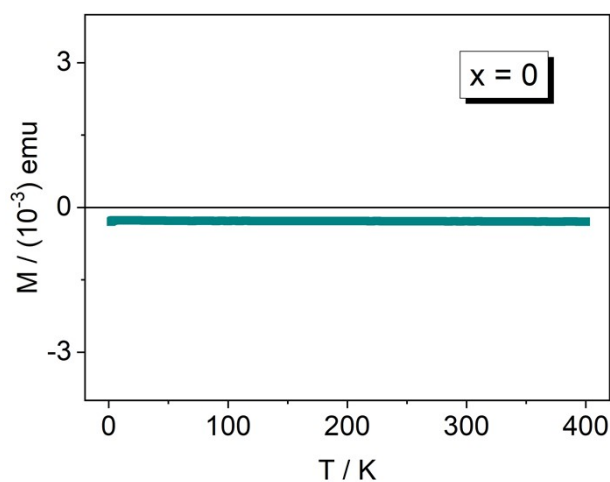

**Figure S14.** The molar magnetic susceptibility of TMAPbI<sub>3</sub>

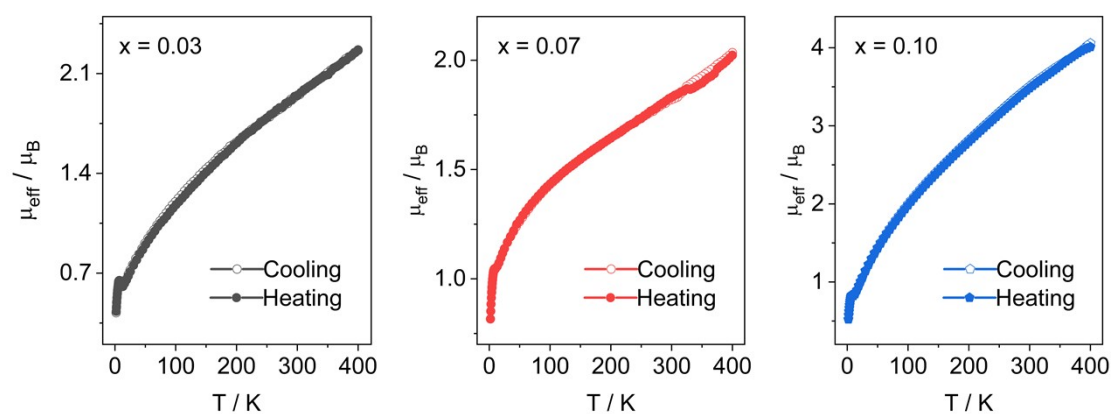

**Figure S15.** Plots of molar paramagnetic susceptibility  $\mu_{\text{eff}}$  versus temperature for TMA<sub>1-x</sub>Pb<sub>1-x</sub>Co<sub>x</sub>I<sub>3-x</sub> with  $x = 0.03$ – $0.10$  range in 2–400 K.

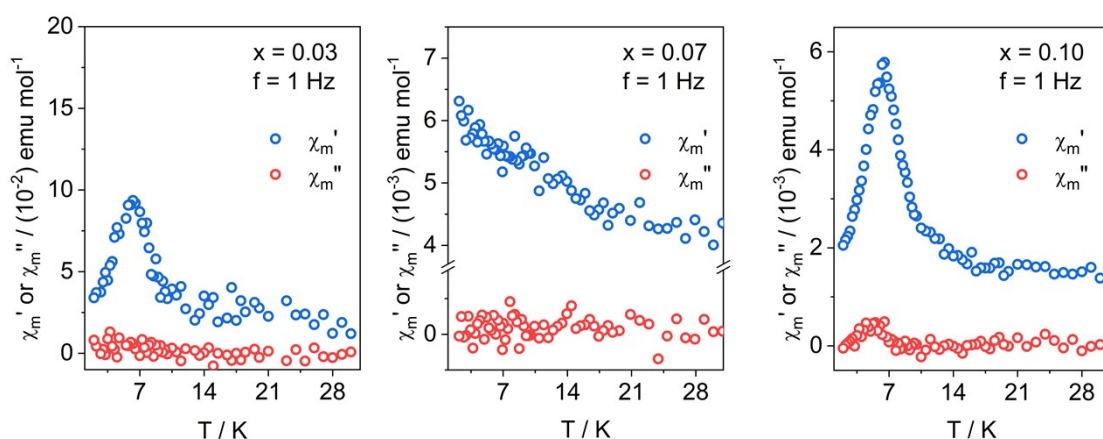

**Figure S16.** Temperature dependences of AC magnetic susceptibility  $\chi_m'$  and  $\chi_m''$  in the frequency of 1 Hz for TMA<sub>1-x</sub>Pb<sub>1-x</sub>Co<sub>x</sub>I<sub>3-x</sub> with  $x =$  (a) 0.03, (b) 0.07 and (c) 0.10.

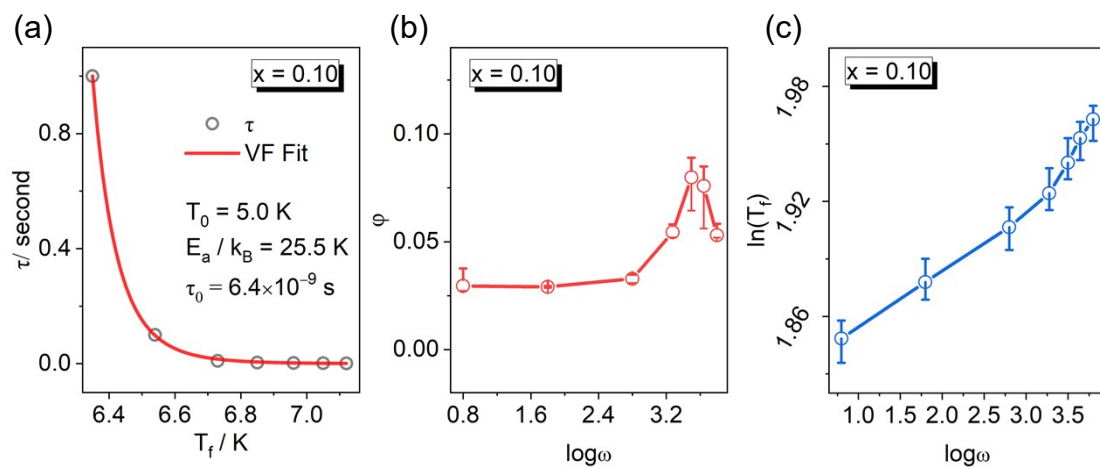

**Figure S17.** (a) Vogel–Fulcher (VF), (b) plot of  $\phi$  vs.  $\log\omega$  and (c) Plot of  $\ln(T_f)$  vs.  $\log\omega$  fit for  $\text{TMA}_{1-x}\text{Pb}_{1-x}\text{Co}_x\text{I}_{3-x}$  ( $x = 0.10$ ).

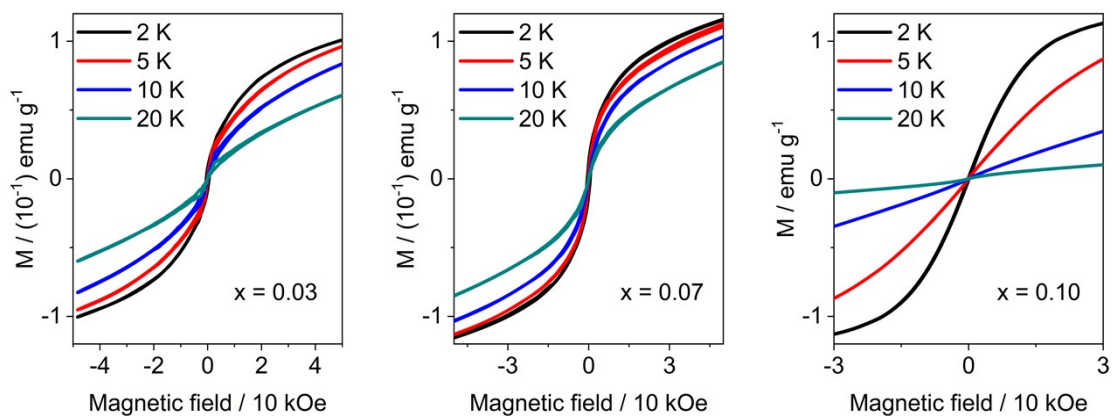

**Figure S18.** Magnetization vs. applied DC field curves for  $\text{TMA}_{1-x}\text{Pb}_{1-x}\text{Co}_x\text{I}_{3-x}$  with  $x = 0.03$ – $0.10$  at 2–20 K.

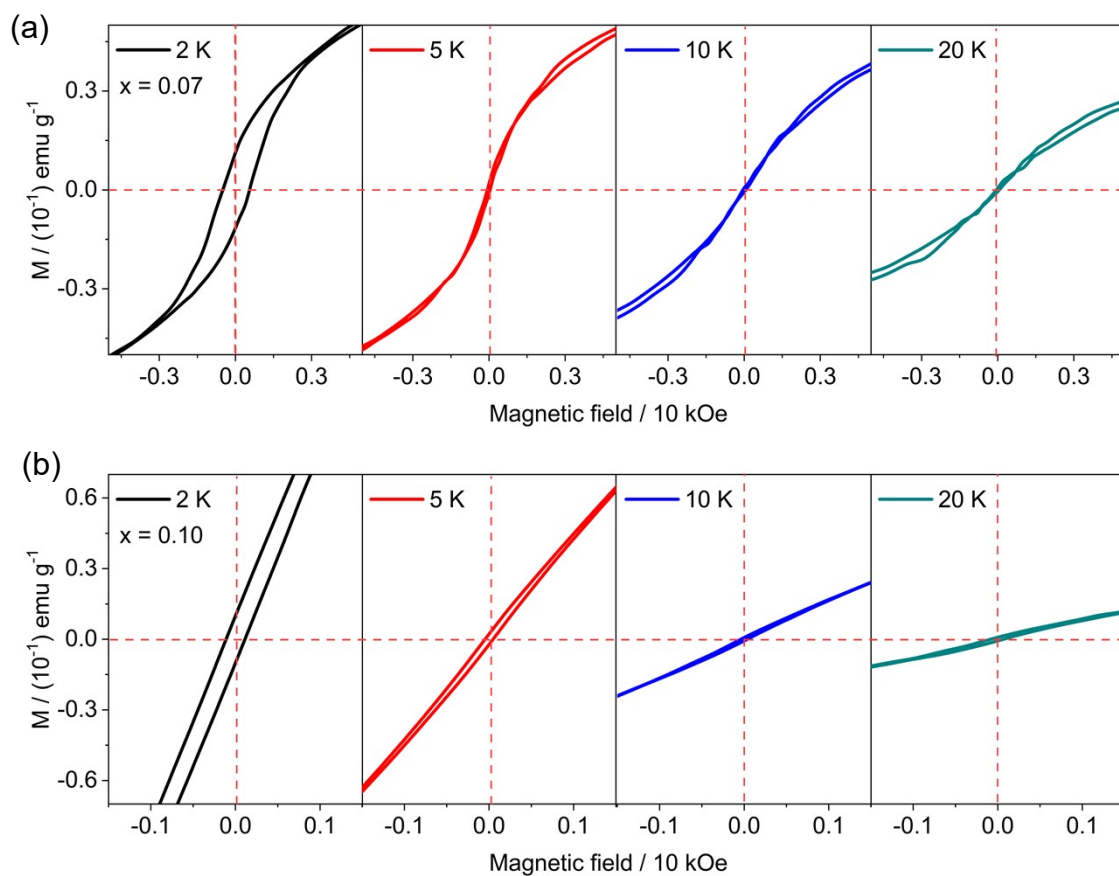

**Figure S19.** Magnetization vs. applied DC field curves for  $\text{TMA}_{1-x}\text{Pb}_{1-x}\text{Co}_x\text{I}_{3-x}$  with (a)  $x = 0.07$  and (b)  $x = 0.10$  at 2–20 K.

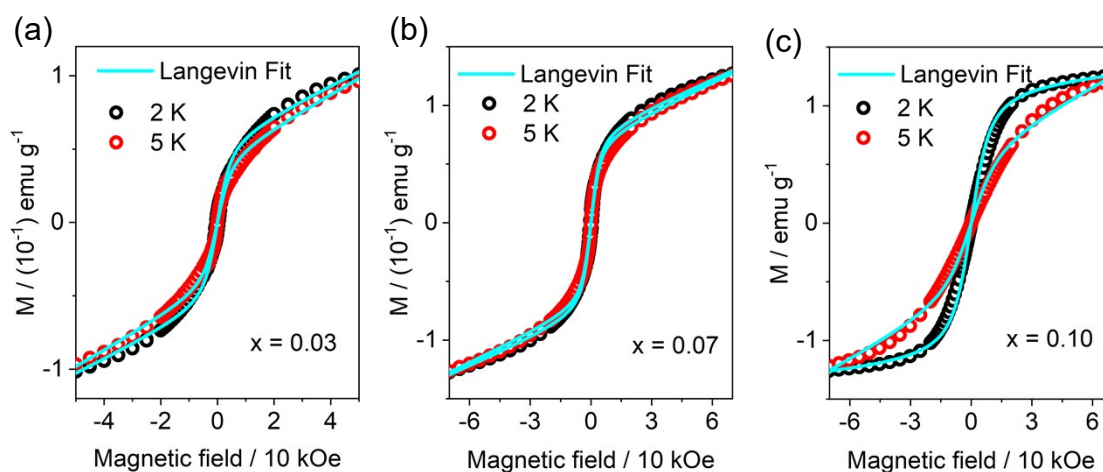

**Figure S20.** Fits of magnetization vs. magnetic field for  $\text{TMA}_{1-x}\text{Pb}_{1-x}\text{Co}_x\text{I}_{3-x}$ , (a)  $x = 0.03$ , (b)  $x = 0.07$ , (c)  $x = 0.10$  at 2 K and 5 K.

**Table S1.** Molar ratio of Co to Pb in  $\text{TMA}_{1-x}\text{Pb}_{1-x}\text{Co}_x\text{I}_{3-x}$  ( $x = 0-0.10$ ) in form of x:(1-x)

| $\text{TMA}_{1-x}\text{Pb}_{1-x}\text{Co}_x\text{I}_{3-x}$ ( $x = 0-0.10$ ) |    |   |   |      |      |      |
|-----------------------------------------------------------------------------|----|---|---|------|------|------|
| Sample                                                                      |    |   | 0 | 0.03 | 0.07 | 0.10 |
| Feed ratio                                                                  | Pb | / |   | 0.99 | 0.95 | 0.90 |
|                                                                             | Co | / |   | 0.01 | 0.05 | 0.10 |
| ICP results                                                                 | Pb | / |   | 0.97 | 0.93 | 0.90 |
|                                                                             | Co | / |   | 0.03 | 0.07 | 0.10 |

**Table S2.** Detailed vibrational assignments in IR spectrum for  $\text{TMA}_{1-x}\text{Pb}_{1-x}\text{Co}_x\text{I}_{3-x}$  ( $x = 0-0.10$ )<sup>1-3</sup>

| Observed frequencies ( $\text{cm}^{-1}$ ) | Approx. mode descriptions            |
|-------------------------------------------|--------------------------------------|
| 3024 (s)                                  | C-H asymmetric stretching            |
| 2975 (bm)                                 | C-H symmetric stretching             |
| 1475 (vs)                                 | C-H asymmetric deformation vibration |
| 1435 (vs)                                 | C-H symmetric deformation vibration  |
| 1407 (m)                                  | C-H symmetric deformation vibration  |
| 1283 (w)                                  | C-N stretching                       |
| 945 (vs)                                  | $\text{CH}_3$ rocking                |

Intensities: s – strong; bm – broad weak; vs – very strong; m –medium; w – weak; sh – shoulder.

**Table S3.** Detailed vibrational assignments in Raman spectrum for  $\text{TMA}_{1-x}\text{Pb}_{1-x}\text{Co}_x\text{I}_{3-x}$  ( $x = 0-0.10$ )<sup>4,5</sup>

|                  | Observed<br>( $\text{cm}^{-1}$ ) | wavenumber | Approx. mode descriptions             |
|------------------|----------------------------------|------------|---------------------------------------|
| Inorganic moiety | 98 (w)                           |            | $A_{1g}$ stretching vibration of Pb-I |
|                  | 87 (sh)                          |            | Lattice vibration                     |
|                  | 60 (m)                           |            | I-Pb-I bending vibration              |
|                  | 39 (s)                           |            |                                       |

Intensities: vs – very strong; m –medium; s – strong; w – weak; sh – shoulder.

**Table S4.** The X-ray photoelectron binding energy values of N 1s, Pb 4f  $_{5/2}$  and Pb 4f  $_{7/2}$ , Co 2p  $_{1/2}$  and Co 2p  $_{3/2}$ , I 3d $_{3/2}$  and I 3d $_{5/2}$  from  $\text{TMA}_{1-x}\text{Pb}_{1-x}\text{Co}_x\text{I}_{3-x}$  ( $x = 0-0.10$ )

| Element |             | $E_b / \text{eV}$ |            |            |           | Ref. |
|---------|-------------|-------------------|------------|------------|-----------|------|
|         |             | $x = 0$           | $x = 0.03$ | $x = 0.07$ | $x = 0.1$ |      |
| N 1s    | /           | 401.27            | 401.82     | 402.47     | 401.95    | 6    |
| Pb 4f   | 4f $_{5/2}$ | 142.03            | 142.63     | 143.43     | 142.71    | 6    |
|         | 4f $_{7/2}$ | 137.13            | 137.73     | 138.53     | 137.81    |      |
| Co 2p   | 2p $_{1/2}$ | /                 | 795.26     | 797.10     | 795.81    | 7    |
|         | 2p $_{3/2}$ | /                 | 780.26     | 782.10     | 780.81    |      |
| I 3d    | 3d $_{3/2}$ | 629.36            | 629.92     | 630.74     | 630.06    | 8    |
|         | 3d $_{5/2}$ | 617.86            | 618.42     | 619.24     | 618.56    |      |

**Table S5.** Parameters obtained by fit of M–H plots at different temperatures for  $\text{TMA}_{1-x}\text{Pb}_x\text{Co}_x\text{I}_{3-x}$  ( $x = 0.03\text{--}0.10$ )

| x                                         | 0.03  |       | 0.07  |       | 0.1   |       |
|-------------------------------------------|-------|-------|-------|-------|-------|-------|
| Temperature / K                           | 2     | 5     | 2     | 5     | 2     | 5     |
| $M_s / \text{emu g}^{-1}$                 | 0.057 | 0.046 | 0.079 | 0.073 | 1.218 | 0.671 |
| $\mu \times 10^{-6} / \mu_B$              | 1.701 | 4.027 | 1.807 | 4.505 | 0.843 | 1.462 |
| $\chi \times 10^{-6} / \text{emu g}^{-1}$ | 0.945 | 1.083 | 0.751 | 0.808 | 1.485 | 9.020 |

### References

1. C. W. Young, J. S. Koehler and D. S. McKinney, *J. Am. Chem. Soc.*, 1947, **69**, 1410–1415. 1
2. K. M. Harmon, I. Gennick and S. L. Madeira, *J. Phys. Chem.*, 1974, **78**, 2585–2591. 1
3. M. Pal, A. Agarwal, M. B. Patel and H. D. Bist, *J. Raman Spectrosc.*, 1984, **15**, 211–216. 1
4. M. A. Hossain, F. Ahmed and J. P. Srivastava, *Phys. status solidi A*, 1995, **151**, 299–304. 1
5. J. G. Contreras, G. V. Seguel, B. Ungerer, W. F. Maier and F. J. Hollander, *J. Mol. Struct.*, 1983, **102**, 295–304. 1
6. J. Chastain and R. C. King Jr, *Perkin-Elmer Corporation*, 1992, **40**, 25. 1
7. W. Xu, L. Zheng, X. Zhang, Y. Cao, T. Meng, D. Wu, L. Liu, W. Hu and X. Gong, *Adv. Energy Mater.*, 2018, **8**, 1703178. 1
8. Z. Zheng, A. Liu, S. Wang, Y. Wang, Z. Li, W. M. Lau and L. Zhang, *J. Mater. Chem.*, 2005, **15**, 4555–4559.
